# Supplementary material for: Hyperthermic Intraperitoneal Chemotherapy for Primary or Recurrent Adrenocortical Carcinoma. A Single Center Study
Source: PubMed Central journal article supplement (PMC7226100; doi:10.3390/cancers12040969), 2020-04-14
Supplement: cancers-12-00969-s001.pdf [file cancers-12-00969-s001.pdf]

*Supplementary Materials*

## **Hyperthermic Intraperitoneal Chemotherapy for Primary or Recurrent Adrenocortical Carcinoma. a Single Center Study**

**Guido Alberto Massimo Tiberio, Vittorio Ferrari, Zeno Ballarini, Giovanni Casole, Marta Laganà, Michele Gritti, Elisa Arici, Salvatore Grisanti, Riccardo Nascimbeni, Sandra Sigala, Alfredo Berruti and Arianna Coniglio**

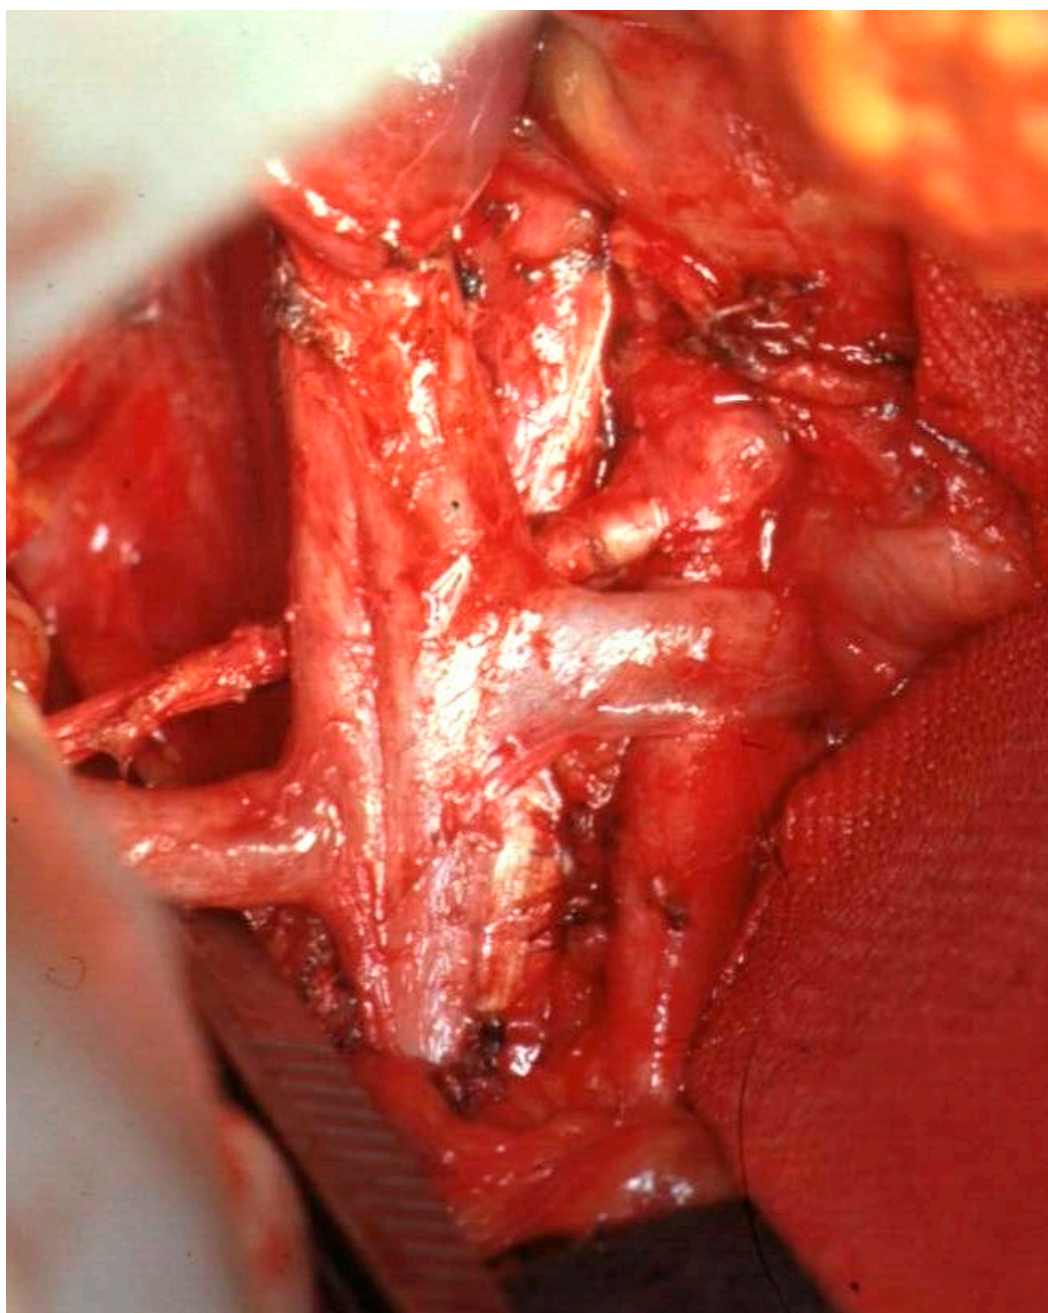

**Figure S1.** Panoramic view of surgical field after right regional adrenalectomy.

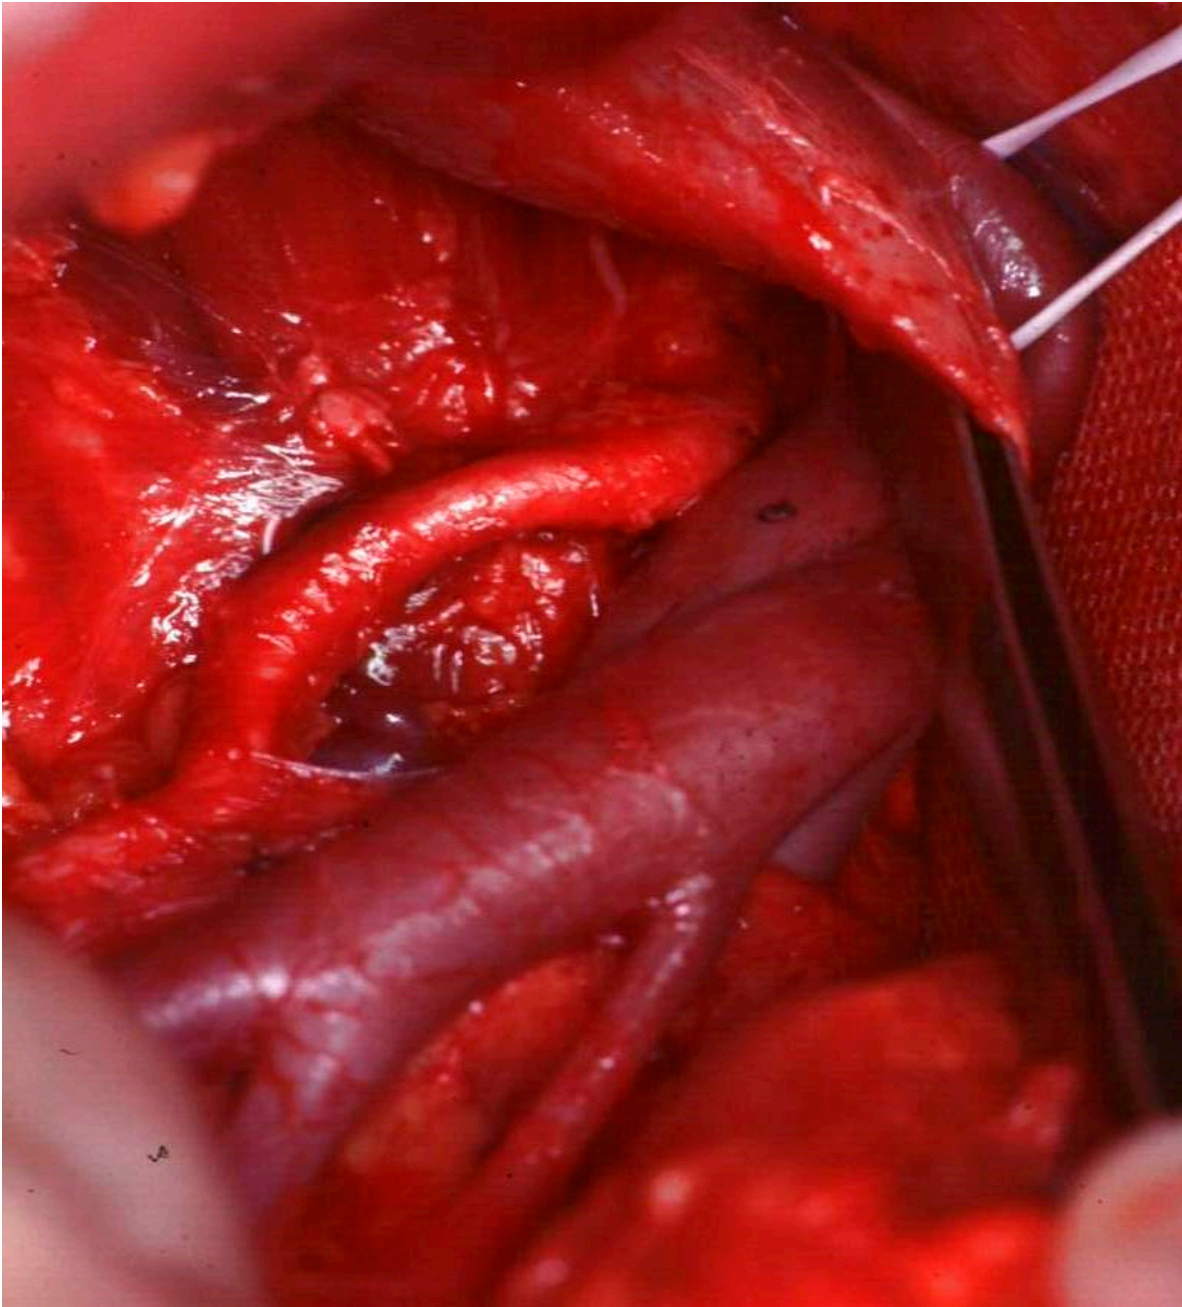

**Figure S2.** Same patient, particular. Renal vessels after regional adrenalectomy.

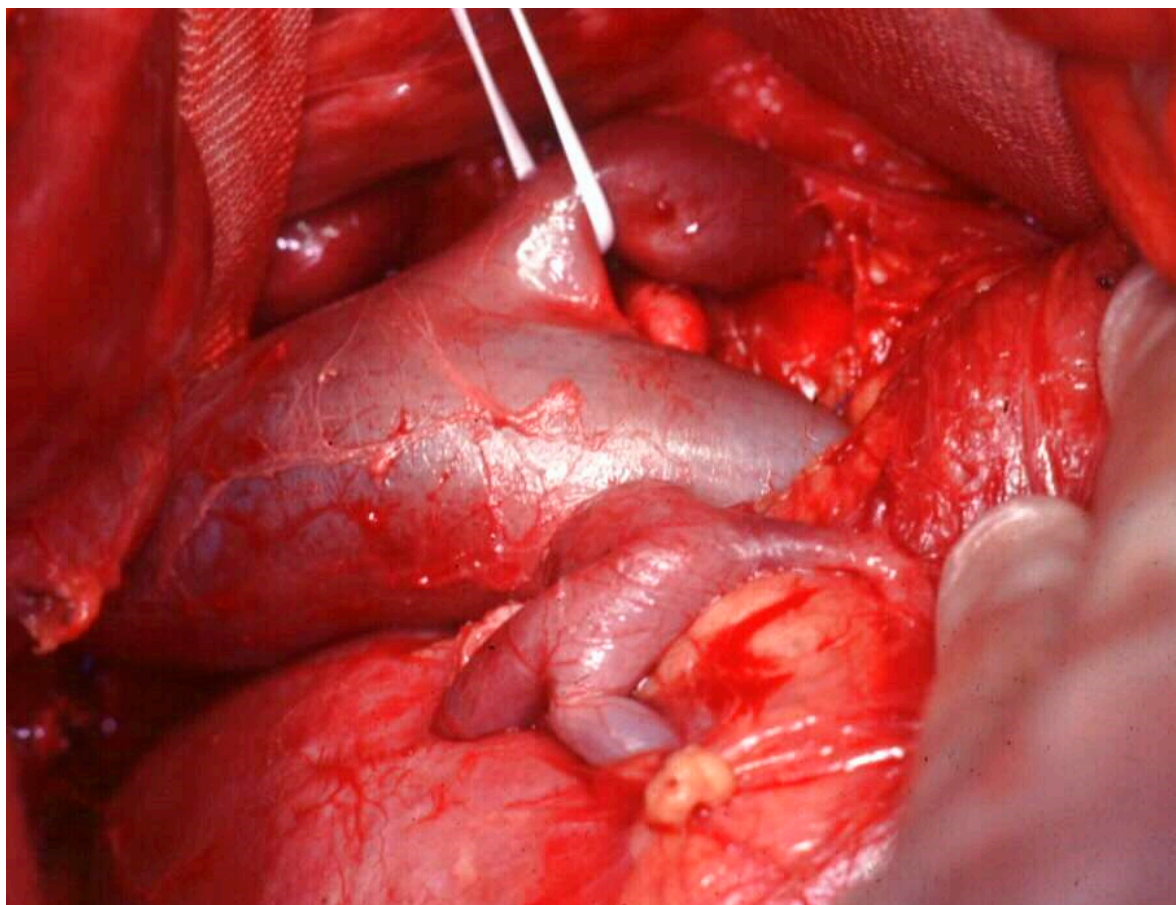

**Figure S3.** Same patient, particular: renal hilum after regional adrenalectomy.



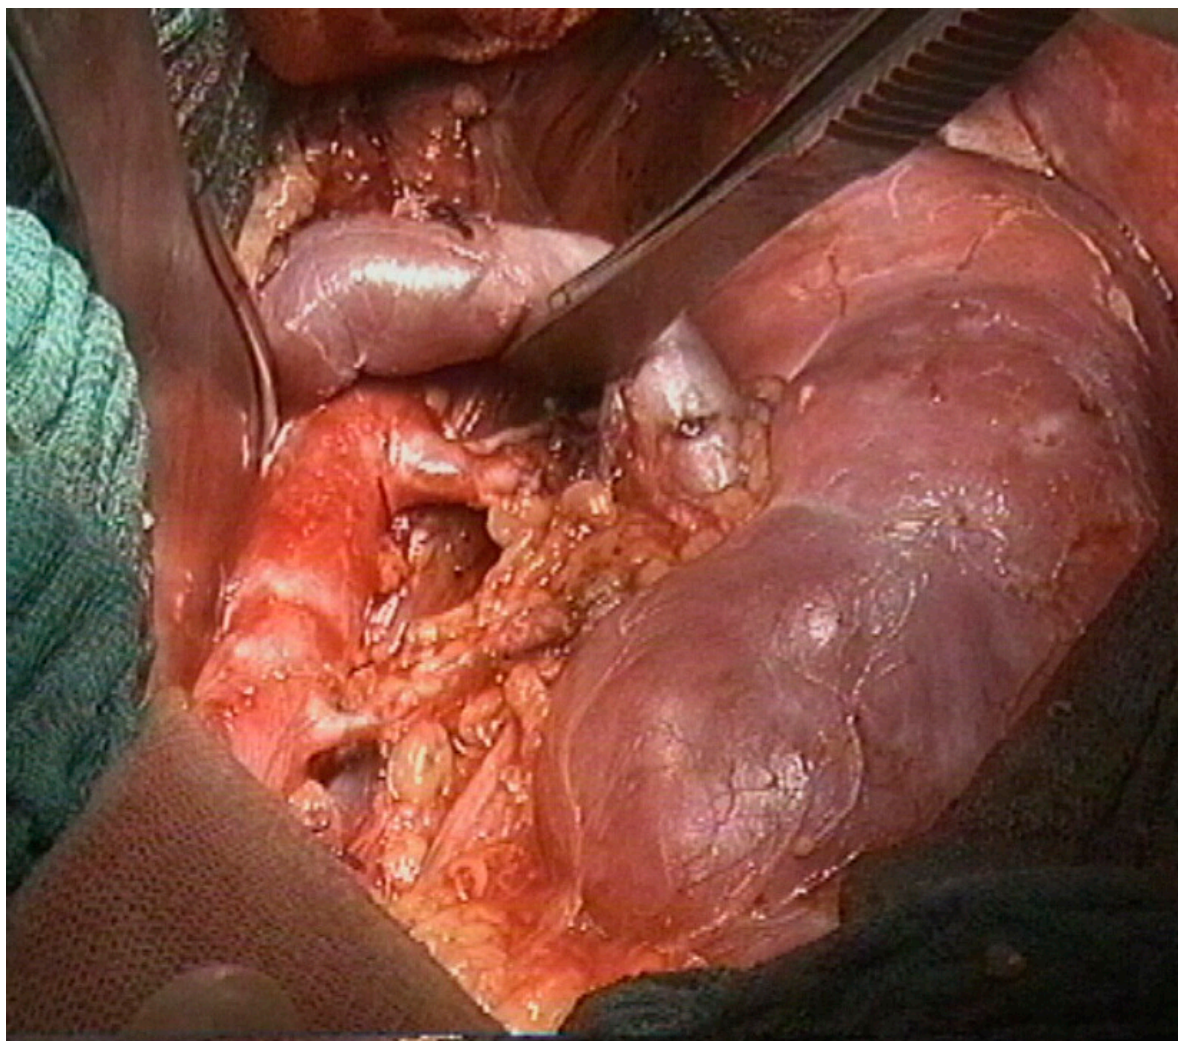

**Figure S4.** Panoramic view of surgical field after left regional adrenalectomy.

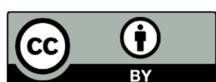

© 2020 by the authors. Licensee MDPI, Basel, Switzerland. This article is an open access article distributed under the terms and conditions of the Creative Commons Attribution (CC BY) license (<http://creativecommons.org/licenses/by/4.0/>).
